# Supplementary material for: Dual-Target Mycobacterium tuberculosis Inhibition: Insights into the Molecular Mechanism of Antifolate Drugs
Source: MDPI journal article supplement (doi:10.3390/ijms241814021), 2023-09-13
Supplement: s1 [file s1]

# **Dual-Target Mycobacterium Tuberculosis Inhibition: Insights into the Molecular Mechanism of Antifolate Drugs**

**Pritika Ramharack <sup>1,2,\*</sup>, Elliasu Y. Salifu <sup>1</sup> and Clement Agoni <sup>2,3</sup>**

**Supplementary Figures**

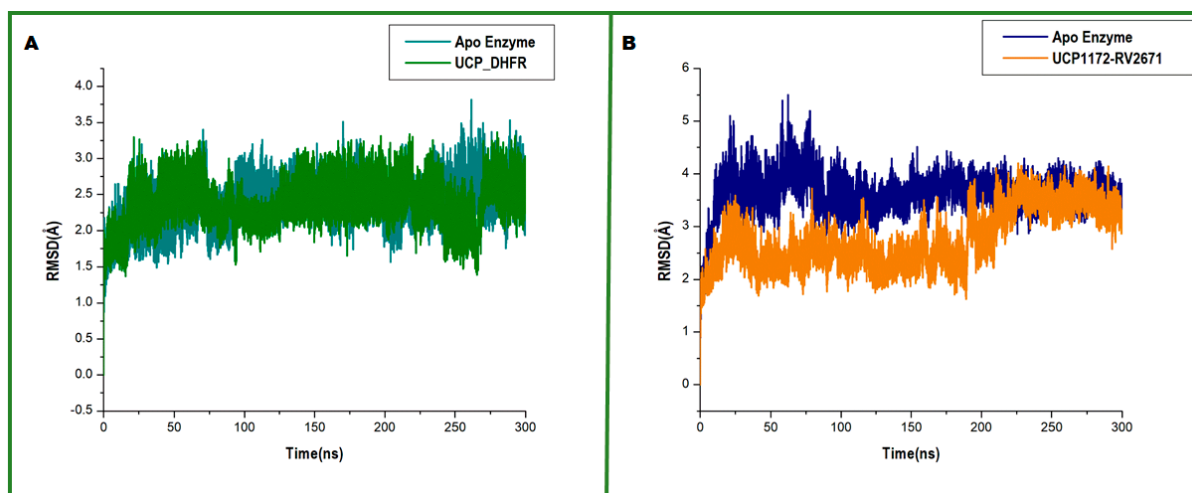

**Figure S1:** (A) A plot of C $\alpha$  RMSD showing stability of active site residues in the DHFR systems upon binding of UCP1172 during the 300ns simulation (B) A plot of C $\alpha$  RMSD showing stability of active site residues in the RV2671 systems upon binding of UCP1172 during the 300ns simulation.

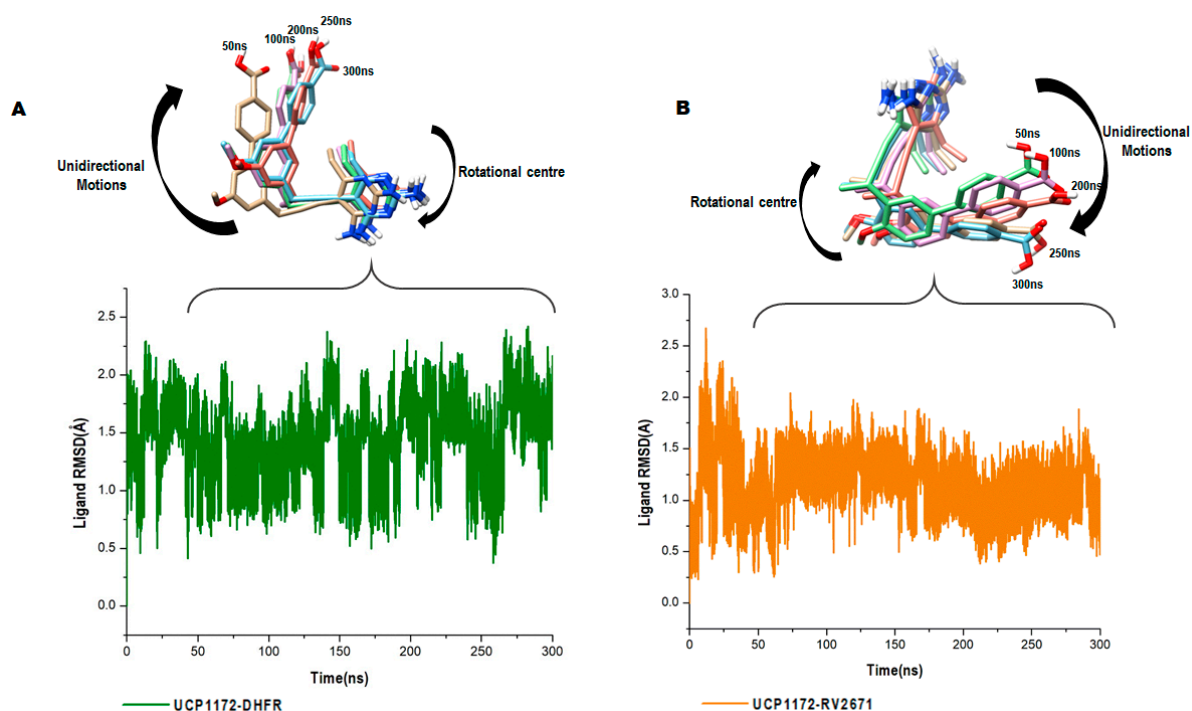

**Figure S2:** (A) A plot of C $\alpha$  RMSD showing stability and motions of UCP1172 at the binding site of DHFR and also its differential positioning at selected times over the 300ns simulation (B) A plot of C $\alpha$  RMSD showing stability and motions of UCP1172 at the binding site of RV2671 and also its differential positioning at selected times over the 300ns simulation.

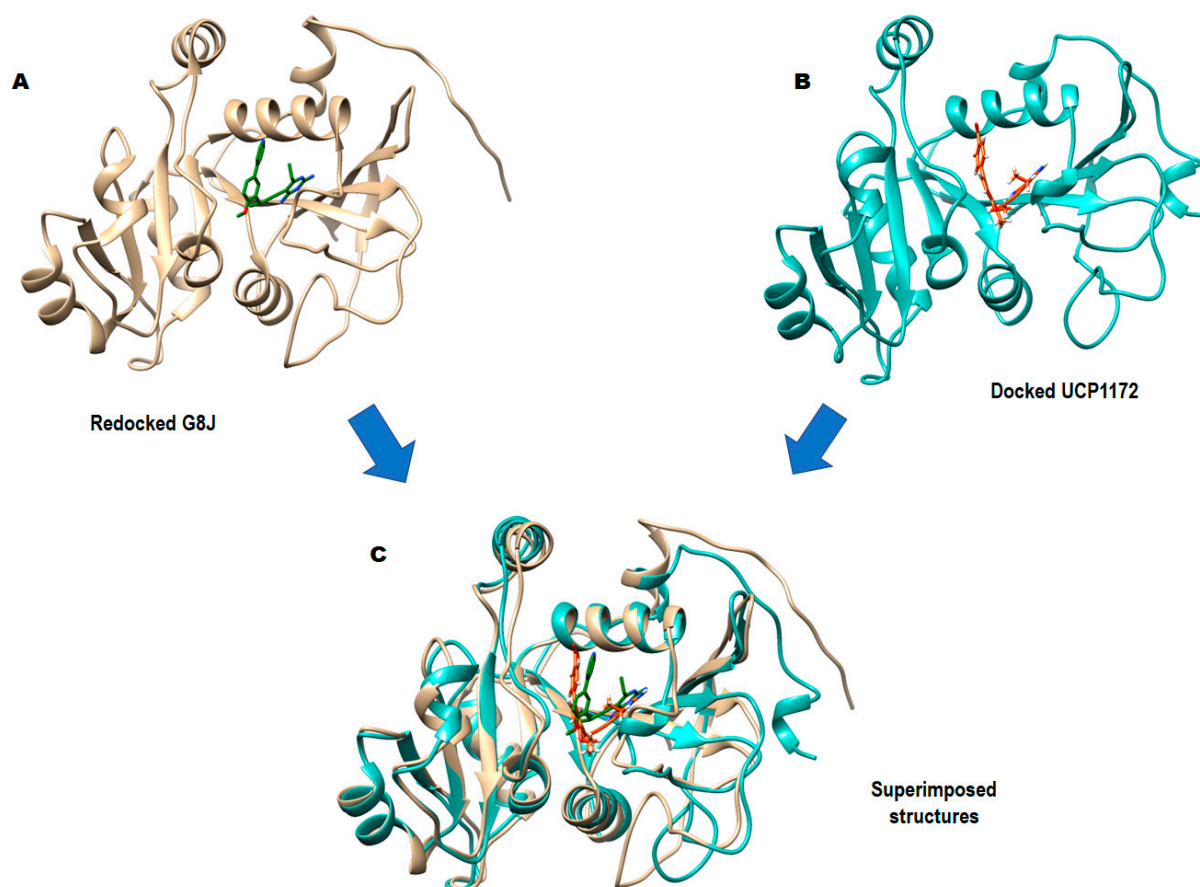

**Figure S3:** **A)** Showing the binding pose of the redocked structure of the native ligand G8J at the active site of RV2671 **B)** Showing the best pose of UCP1172 at the binding pocket of RV2671 **C)** Superimposed structures highlighting a similarity in binding poses between the two structures validating the docking protocol.

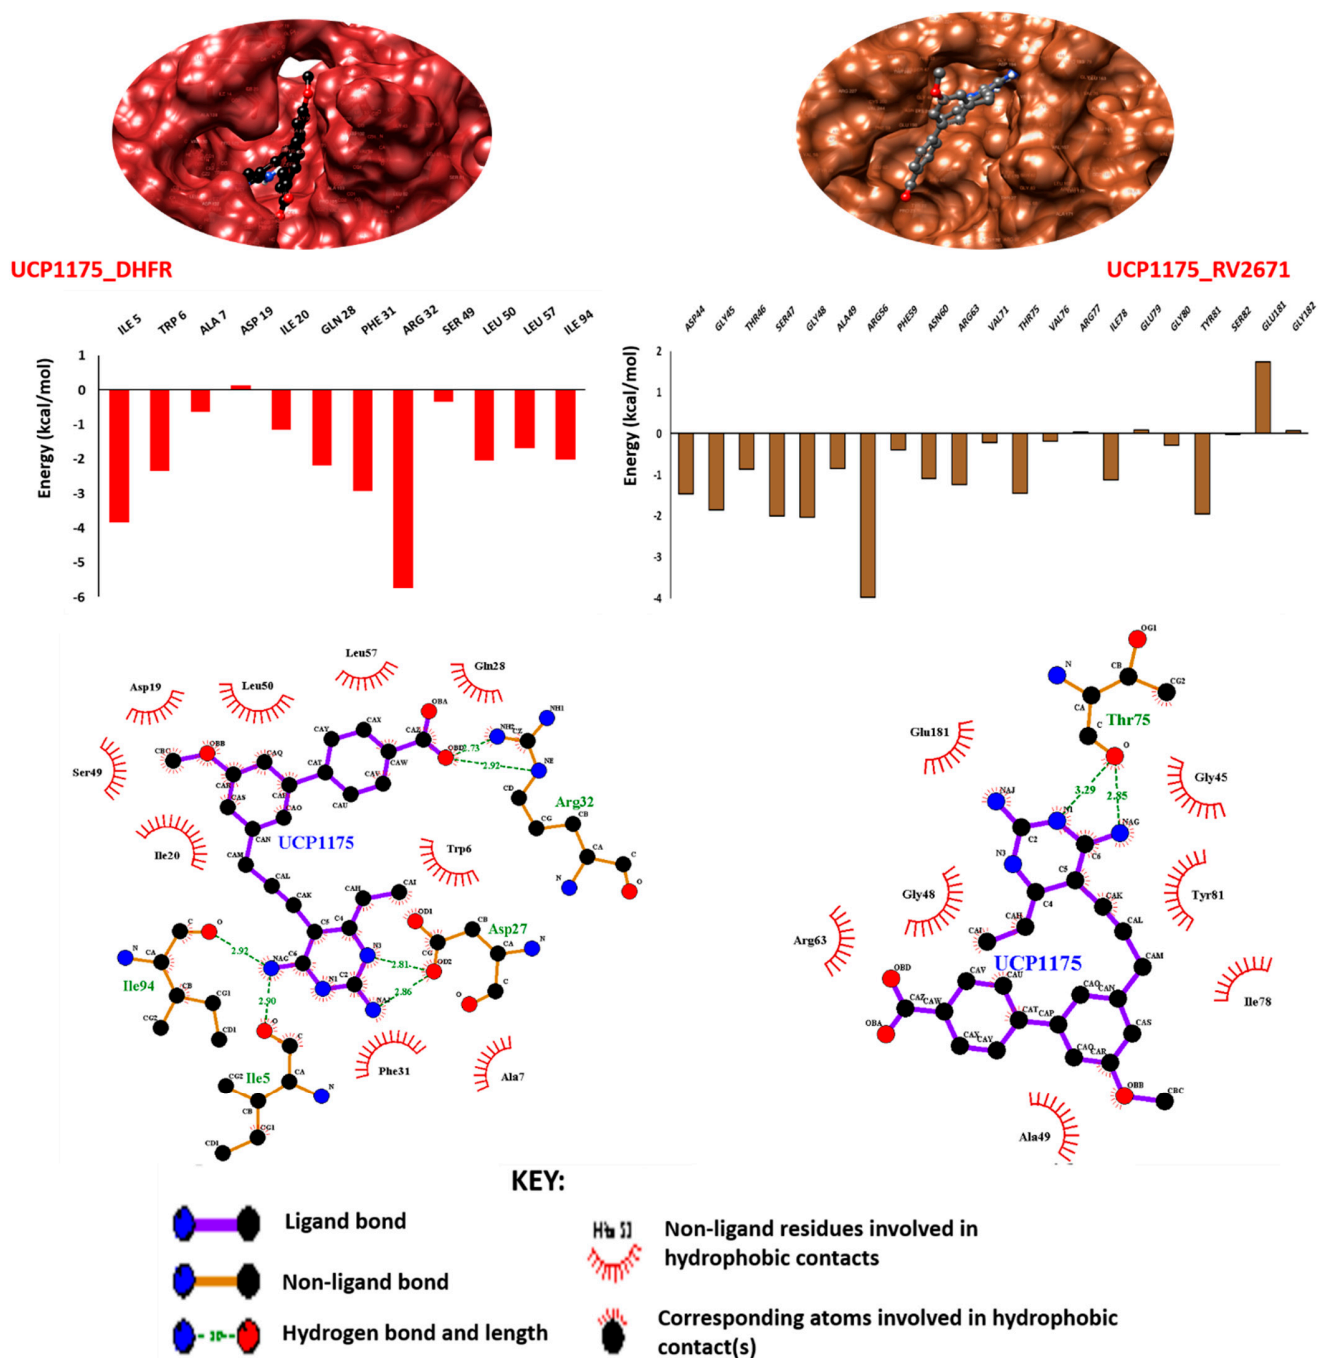

**Figure S4:** Binding landscape and molecular interaction plots of the DHFR and RV2671 in complex with UCP1175. Graphs demonstrated the energy contributions of each active-site residue to the final free-binding energy of each system.

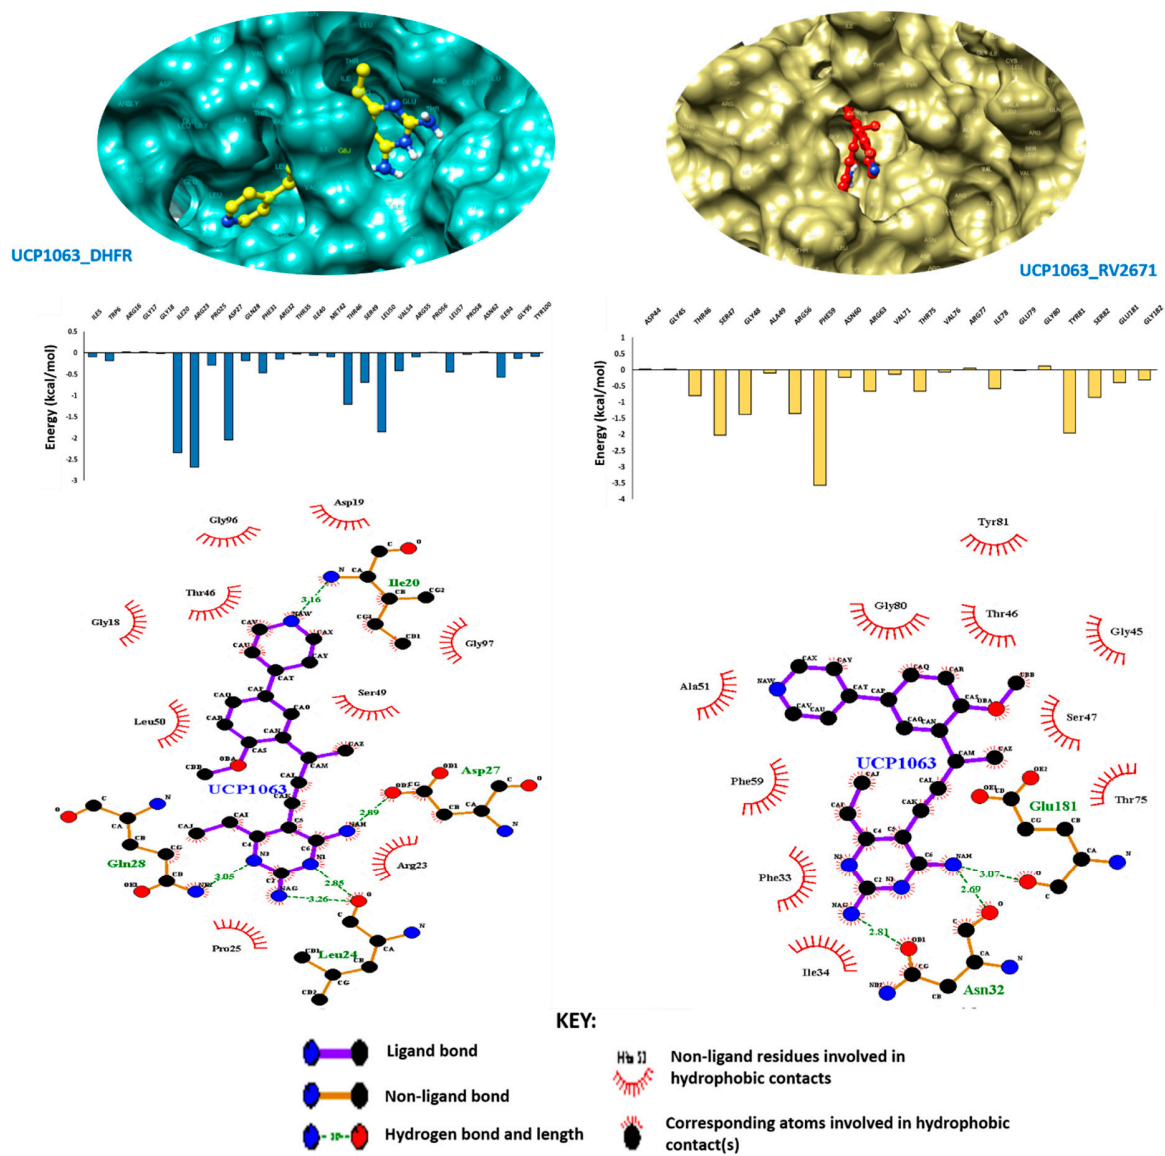

**Figure S5:** Binding landscape and molecular interaction plots of the DHFR and RV2671 in complex with UCP1063. Graphs demonstrated the energy contributions of each active-site residue to the final free-binding energy of each system
